# Supplementary material
Source: Springer Nature journal article supplement (https://www.springermedizin.de/resource/supplementary/12943_2012_1123_MOESM4_ESM.pdf/9552540)

A

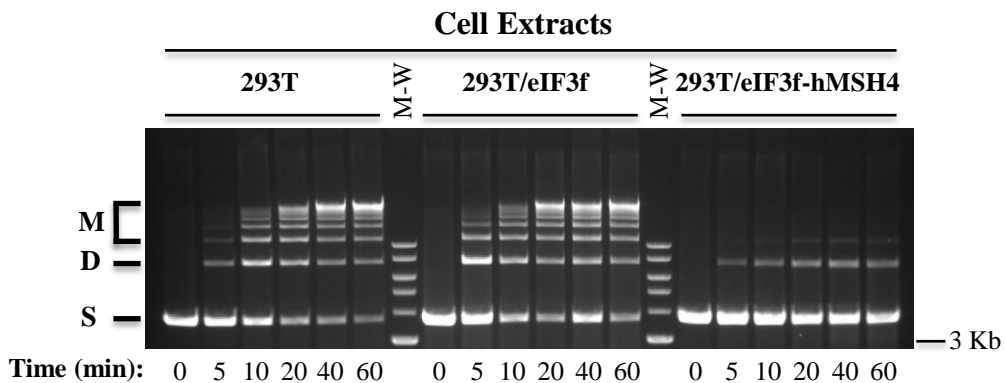

B

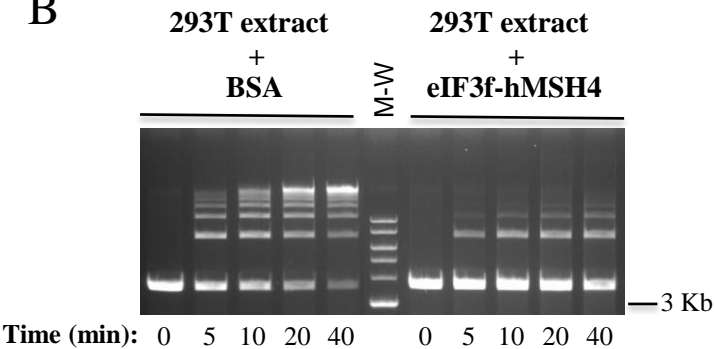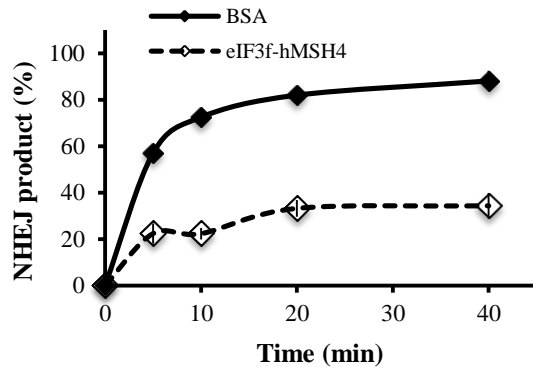

Supplement: MOESM4 [file 9552540]
